# Supplementary material
Source: publisher site journal article supplement (https://www.dovepress.com/article/565416)
Supplement: Supplementary file 1 [file 565416%20Revised%252509Supplementary%20material-.docx]

**Figure S1.**

**
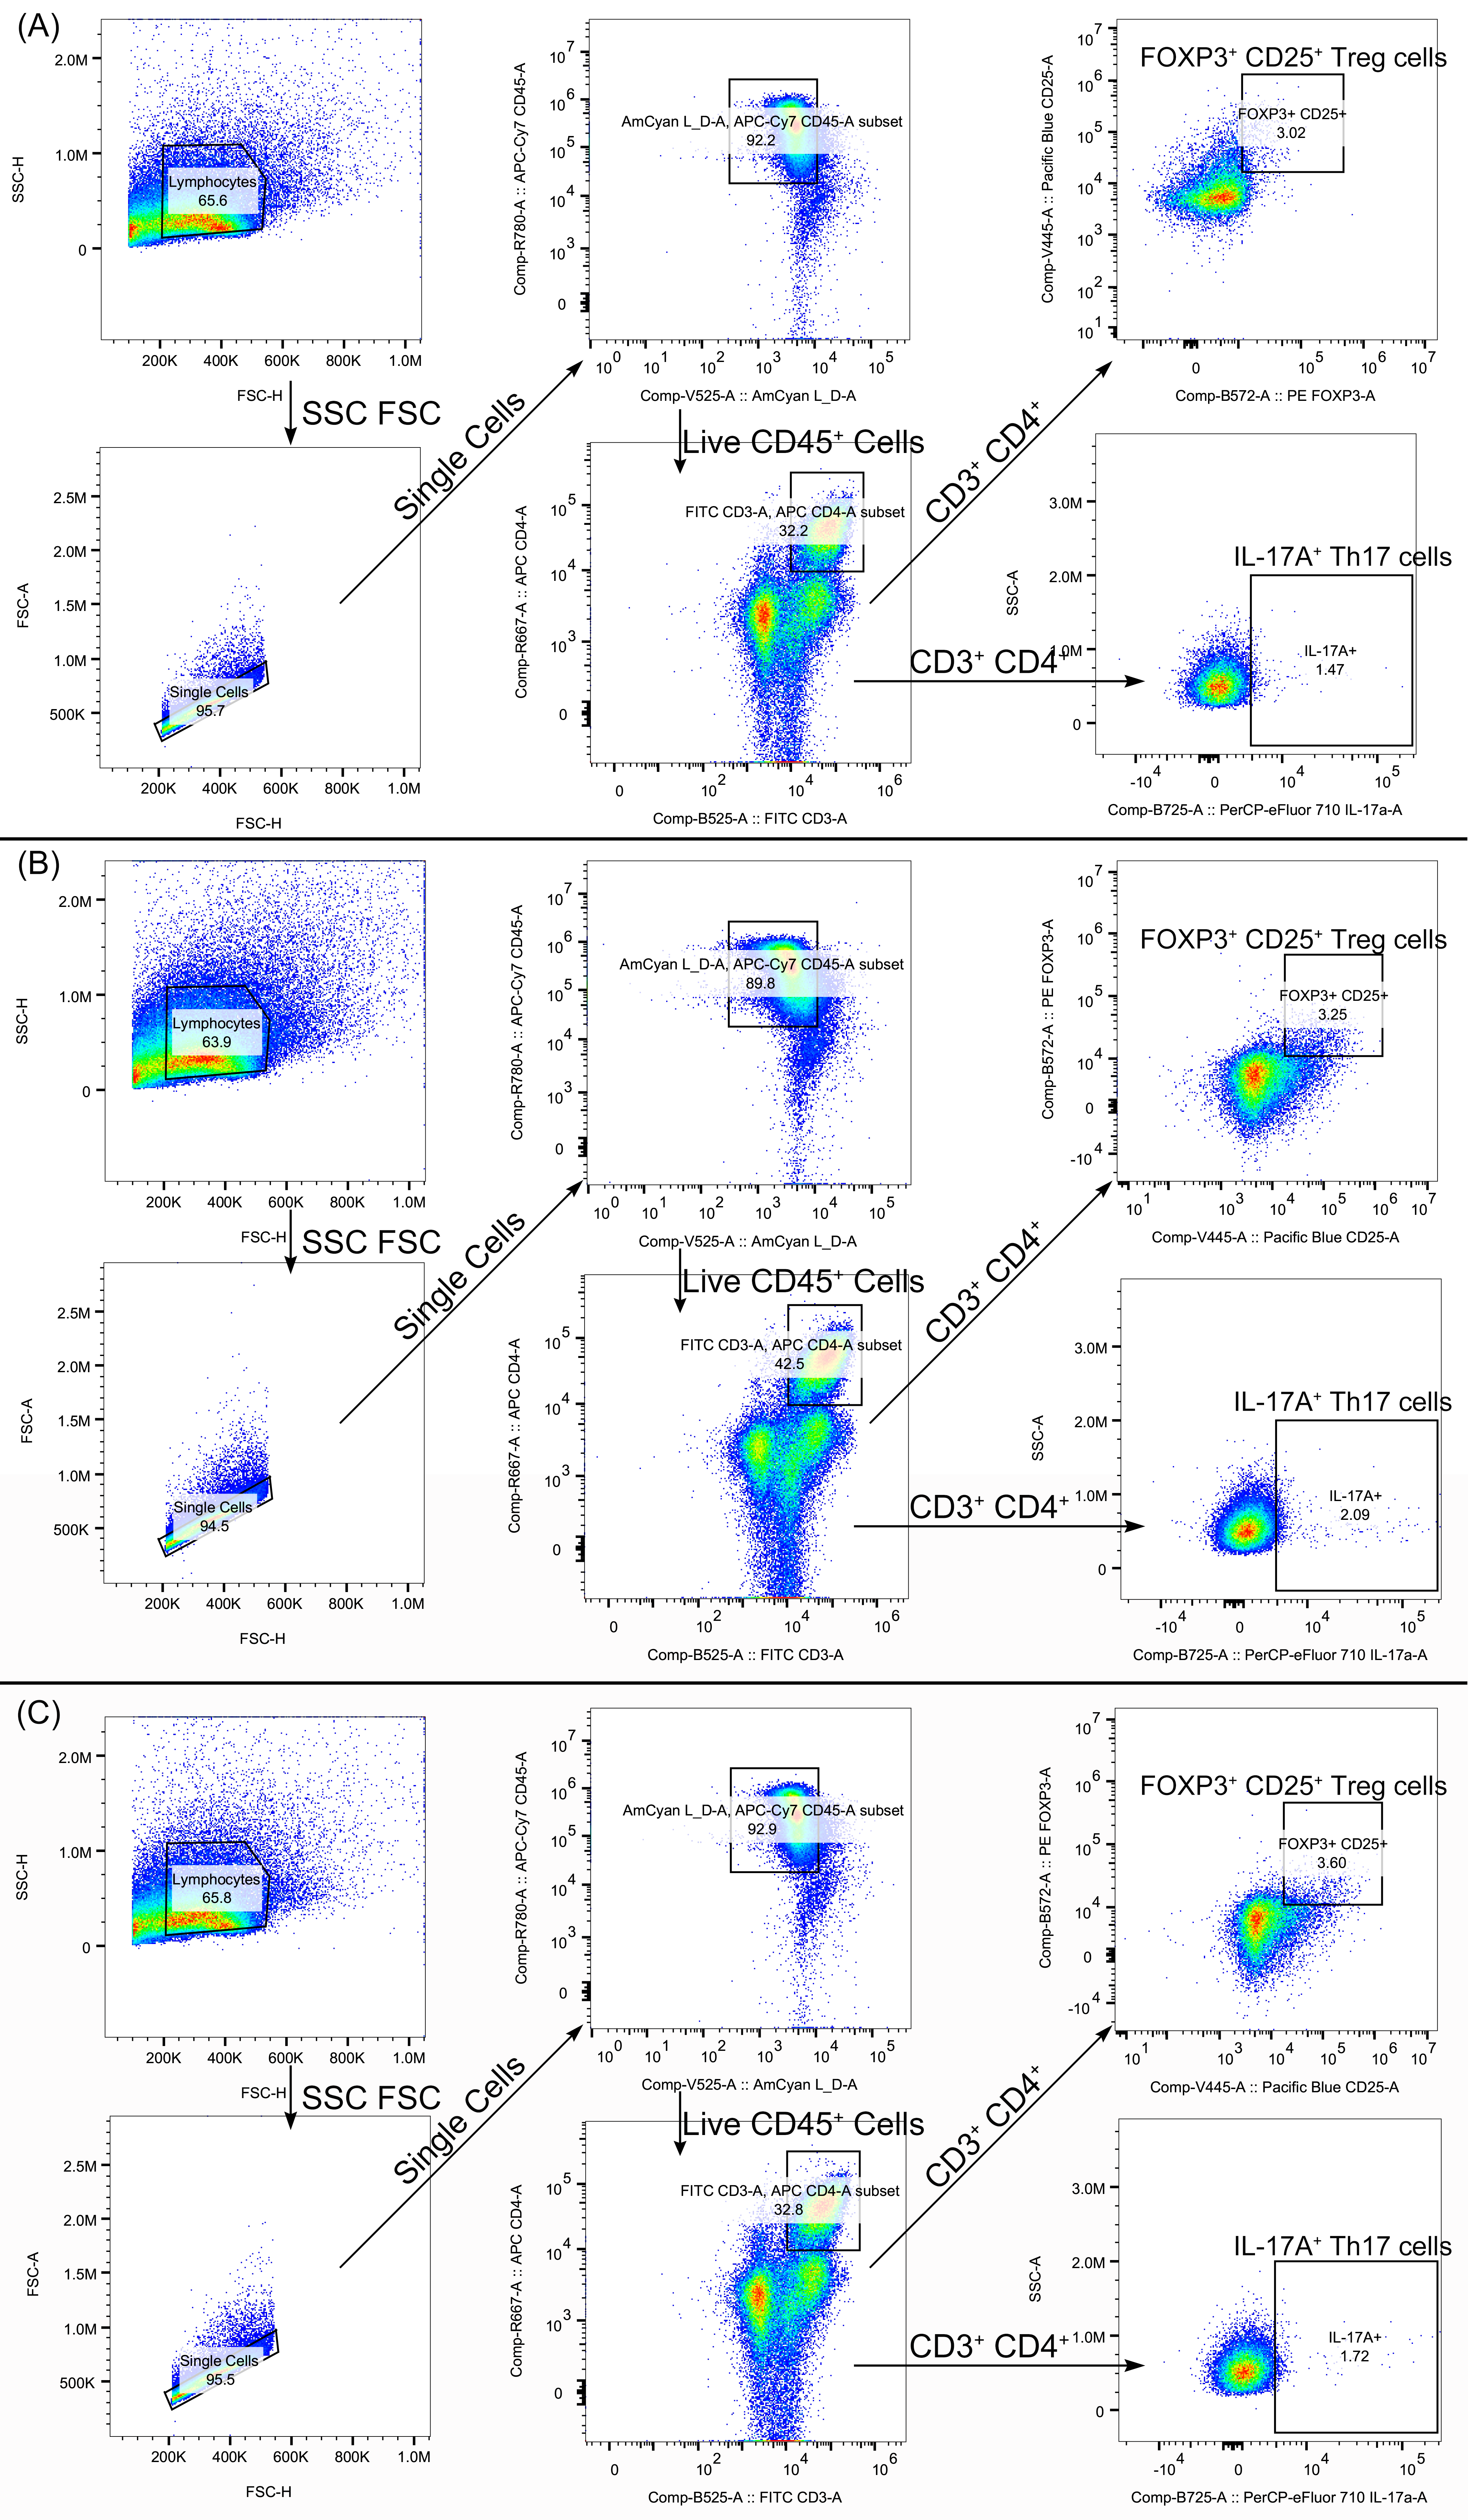
**

**Figure S1.** **Flow cytometry gating scheme of Th17 (CD45+ CD3+ CD4+ IL-17A+) and Treg (CD45+ CD3+ CD4+ CD25+ Foxp3+) cells.** (A) Representative flow cytometry plots showing gating strategy of the Control group. (B) Representative flow cytometry plots showing gating strategy of the DSS group. (C) Representative flow cytometry plots showing gating strategy of the MSC NVs-L group.

**Figure S2.**

**
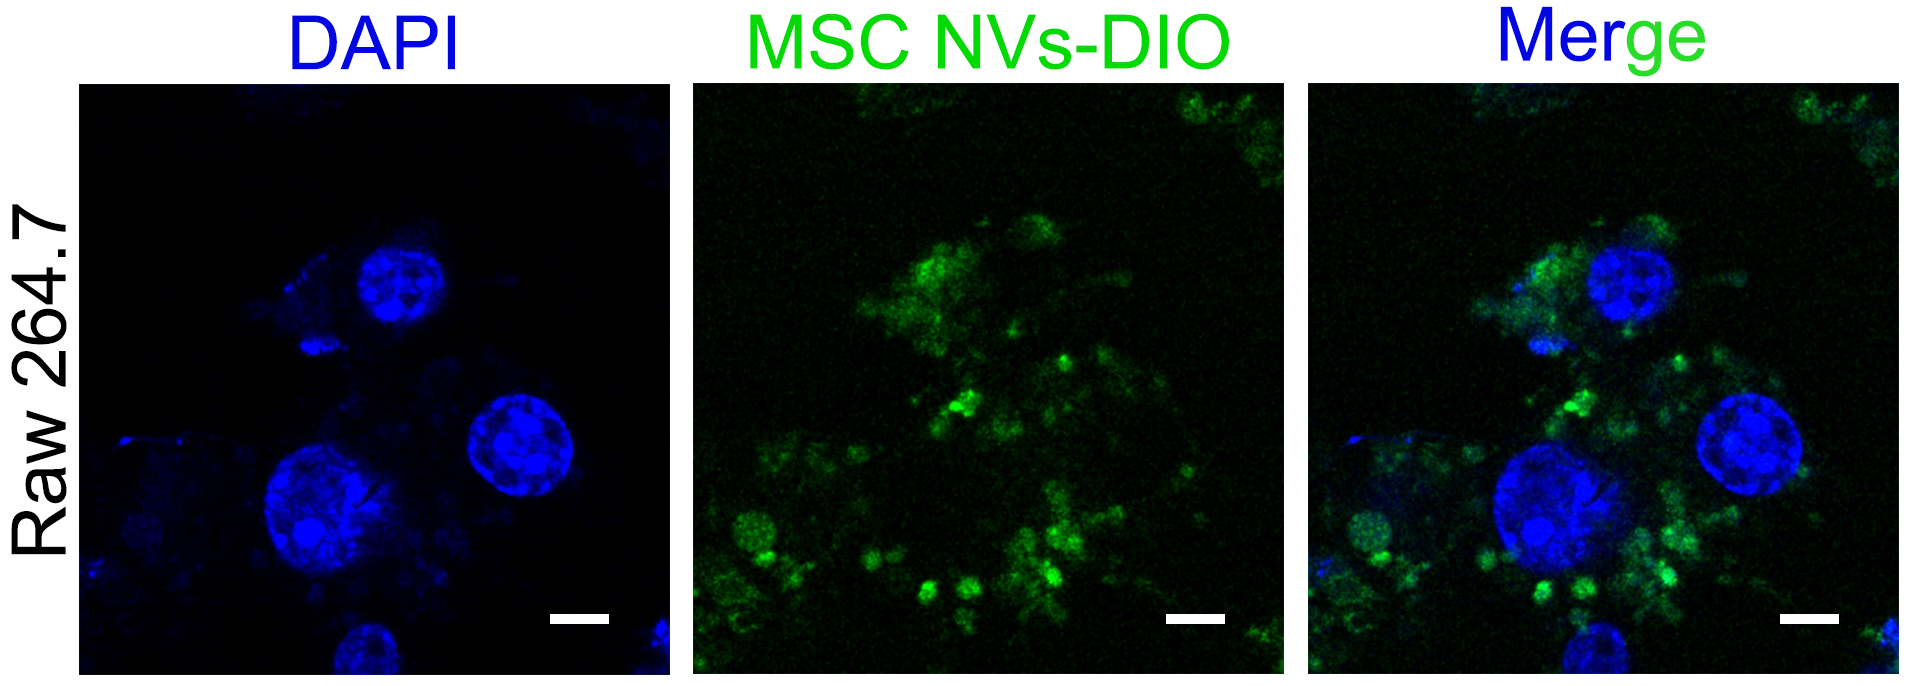
**

**Figure S2. Representative images showing the uptake of DIO-labeled MSC NVs by Raw264.7 cells (Scale bar, 5 μm).**

**Figure S3.**

**
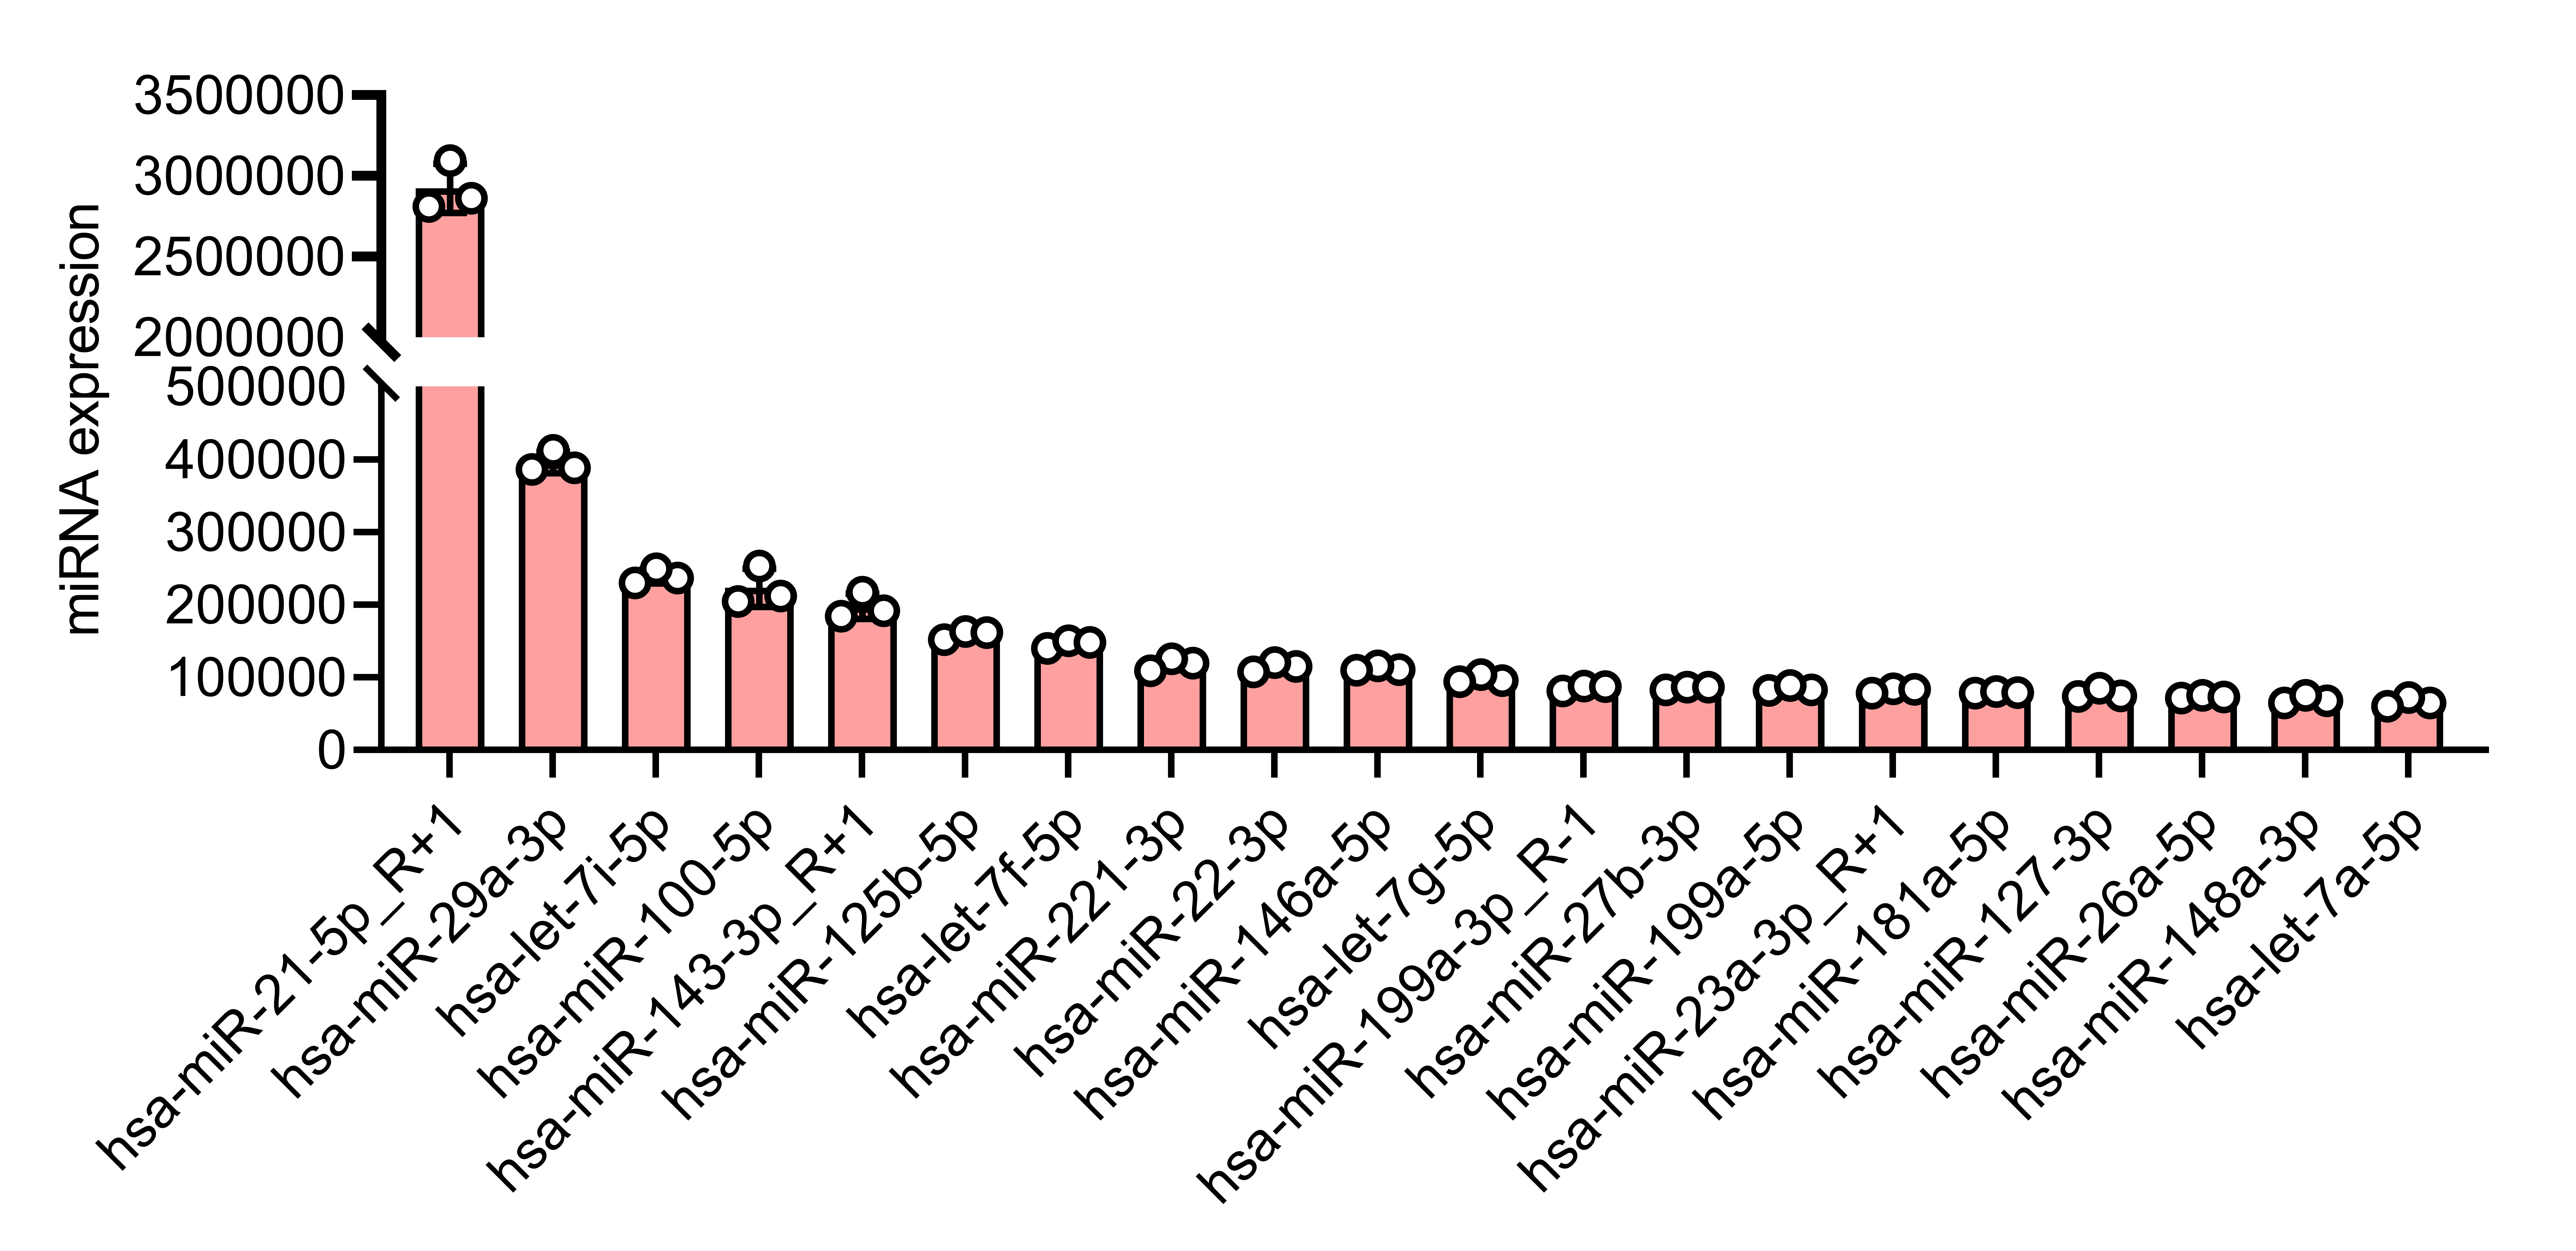
**

**Figure S3. The top 20 highly expressed miRNAs in MSC NVs.**

**Figure S4.**


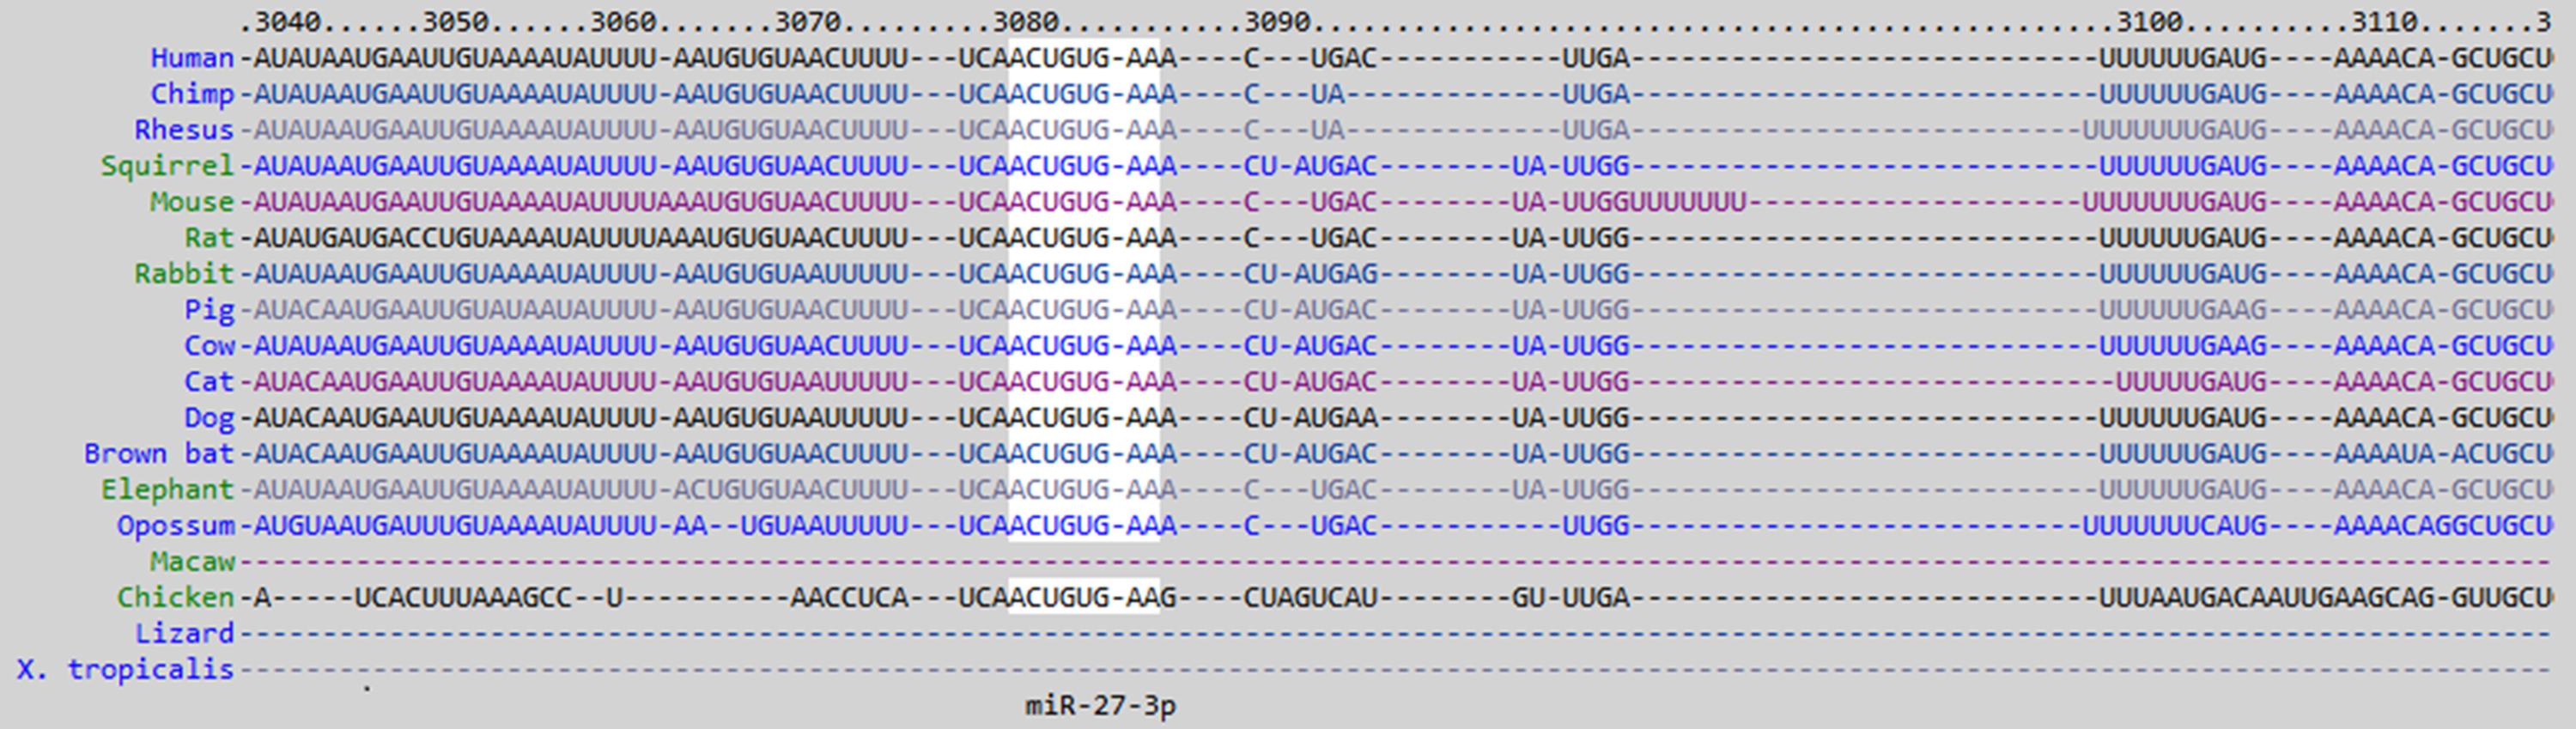


**Figure S4. The has-miR-27b-3p possessed highly conserved target sites within the 3' UTR of the *PIK3CA* gene across multiple species.**

**Table S1. Primers used for mRNA analysis.**

| Gene Name | Forward Sequence  (5′→3′) | Reverse Sequence  (5′→3′) |
| --- | --- | --- |
| m-β-actin | GCTTCTAGGCGGACTGTTACT | GCCTTCACCGTTCCAGTTTTT |
| m-Mucin 2 | GCCCACCTCACAAGCAGTAT | GTCATAGCCAGGGGCAAACT |
| m-Occludin | TTCAAAAGGCCTCACGGACA | TTGAACTGTGGATTGGCAGC |
| m-Claudin-1 | TCATGCCAATGGTGGACACA | GACTGTGGATGTCCTGCGTT |
| m-ZO-1 | AGAAATCCTTTCACACCTACTGA | GCACATCAGCACGATTTCTGT |
| m-PIK3CA | CAAGAGTACACCAAGACCAGAGAGTT | TGTCGTCCATCCACCATGATGT |
| h-PIK3CA | CTTGTTCCAATCCCAGGTGGA | GAAAGGCAAAGTCGAGCAGC |
| h-β-actin | CCTCGCCTTTGCCGATCC | CGCGGCGATATCATCATCC |

Notes: m for mice; h for human.

**Table S2. Primers used for miRNA analysis.**

| Gene Name | Forward Sequence  (5′→3′) | Reverse Sequence  (5′→3′) |
| --- | --- | --- |
| U6 | CCTGCTTCGGCAGCACA | Universal 3′ qPCR Primer |
| has-miR-27b-3p | TTCACAGTGGCTAAGTTCTGC | Universal 3′ qPCR Primer |

Notes: The universal reverse primer was provided in EZ-press microRNA qPCR Kit.

**Table S3.** **Primers used for plasmid sequencing.**

| Primer Name | Sequence  (5′→3′) |
| --- | --- |
| Luc-F | GAGATCGTGGATTACGTCGC |
| 108536W1F-123354 | TGGATTGGTGACTTTCACATAGG |

**Table S4.** **Plasmid sequencing result**

| Plasmid Name | Sequence |
| --- | --- |
| pGL3-CMV-LUC-H_PIK3CA 3'UTR WT | AGAAGAATGGAATTTGGTTGCTATTTTACAATAGAACCTAAGCTTTTTGTGGTTCTTAGTGTCCTATGTAAAACTTAGTGTCAAAGTAATCAACTTTGAGATTTTCCCTTCTATTCTGCTTTATATTAAAAGCCCATTAGAAAATGGGAACCTGGTGAATATATAATGAATTGTAAAATATTTTAATGTGTAACTTTTTCAACTGTGAAACTGACTTGATTTTTTGATGAAAACAGCTGCTGATAAAGTATTTTGTGTAAAGTGTAGTTCTTATTAATCAGGAAAATGATGACTTGATTAGACTGTATATGCCCTCTTGGATTTTATTTTAAATGGATTGGTGACTTTCACATAGGTAAAACACAGTCCATCTGTATTCTTTTTTCCATCAAAAATCGAGTGATTTGGAATTATAAAAAAATTGTGAGCAGCCTATTTGAAAGGCATCATGGAAATTTCACAGCACAATAACACGGATTTGTTTTTTCTTAATGATGTAA |
| pGL3-CMV-LUC-H_PIK3CA 3'UTR MT | AGAAGAATGGAATTTGGTTGCTATTTTACAATAGAACCTAAGCTTTTTGTGGTTCTTAGTGTCCTATGTAAAACTTAGTGTCAAAGTAATCAACTTTGAGATTTTCCCTTCTATTCTGCTTTATATTAAAAGCCCATTAGAAAATGGGAACCTGGTGAATATATAATGAATTGTAAAATATTTTAATGTGTAACTTTTTCA**CAGTGTCC**ACTGACTTGATTTTTTGATGAAAACAGCTGCTGATAAAGTATTTTGTGTAAAGTGTAGTTCTTATTAATCAGGAAAATGATGACTTGATTAGACTGTATATGCCCTCTTGGATTTTATTTTAAATGGATTGGTGACTTTCACATAGGTAAAACACAGTCCATCTGTATTCTTTTTTCCATCAAAAATCGAGTGATTTGGAATTATAAAAAAATTGTGAGCAGCCTATTTGAAAGGCATCATGGAAATTTCACAGCACAATAACACGGATTTGTTTTTTCTTAATGATGTAA |

Notes: The site with an underscore denotes the mutation locus.

**Table S5. Sequences of siRNA**

| Name | Forward Sequence  (5′→3′) | Reverse Sequence  (5′→3′) |
| --- | --- | --- |
| hsa-miR-27b-3p mimics | UUCACAGUGGCUAAG  UUCUGC | GCAGAACUUAGCCAC  UGUGUU |
| NC mimics | UCACAACCUCCUAGAAAG  AGUAGA | UCUACUCUUUCUAGGAGG  UUGUGA |
